# Supplementary material
Source: PubMed Central journal article supplement (PMC2213702)

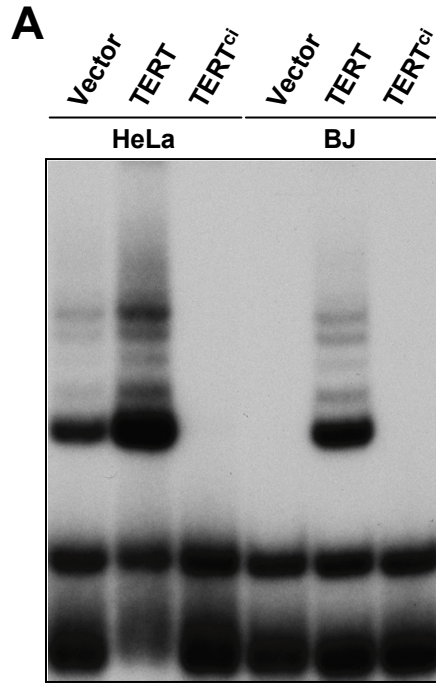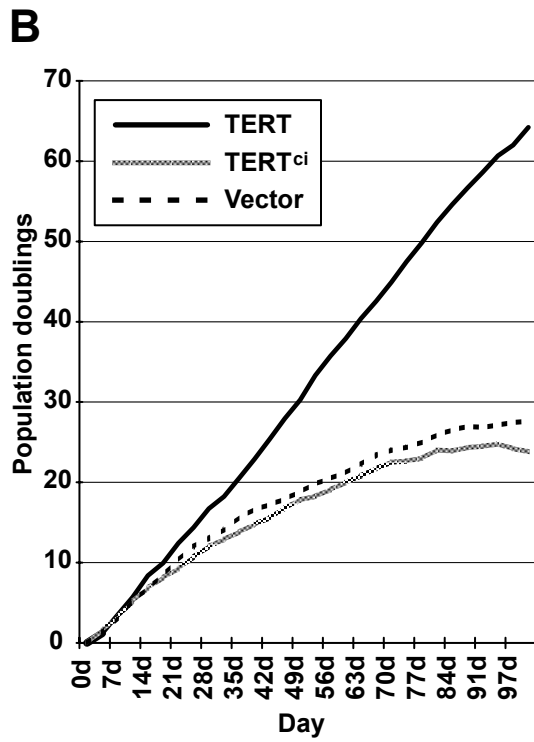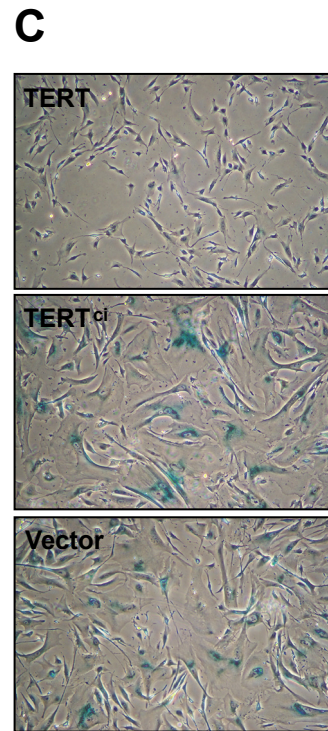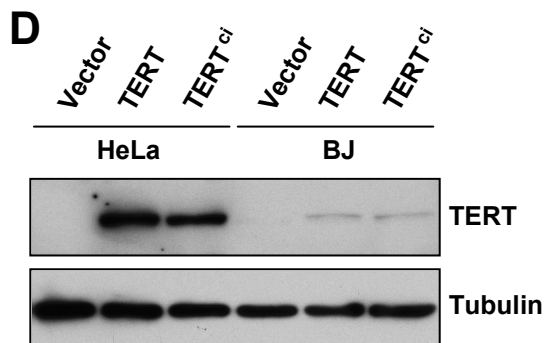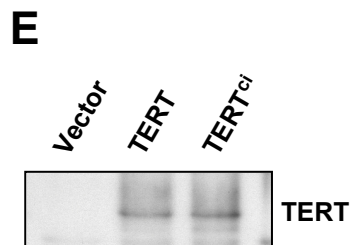

Supplement: pgen.0040010.sg001.pdf [file pgen.0040010.sg001.pdf]

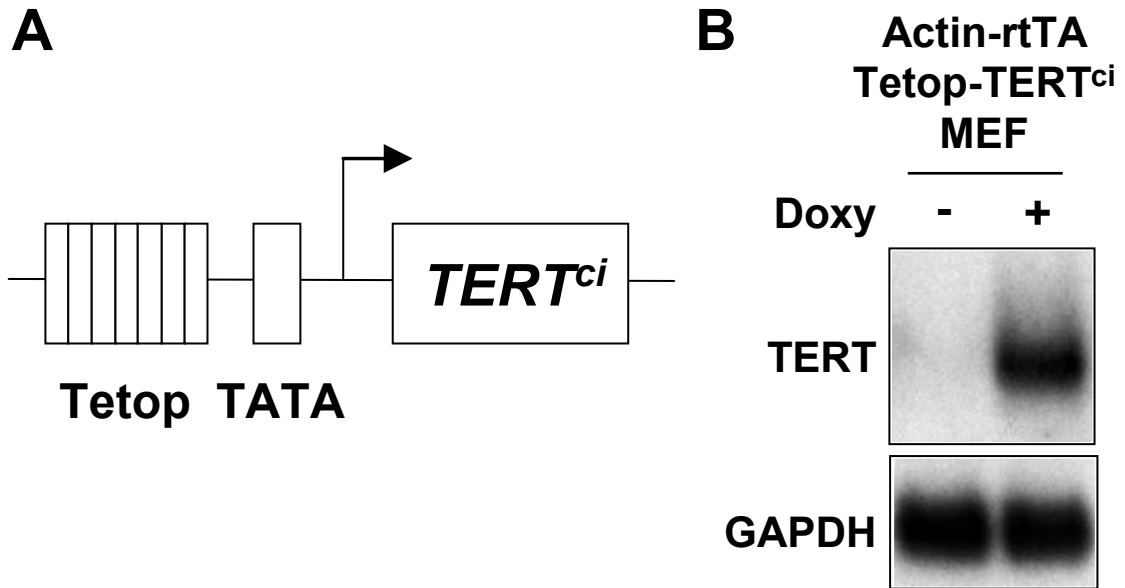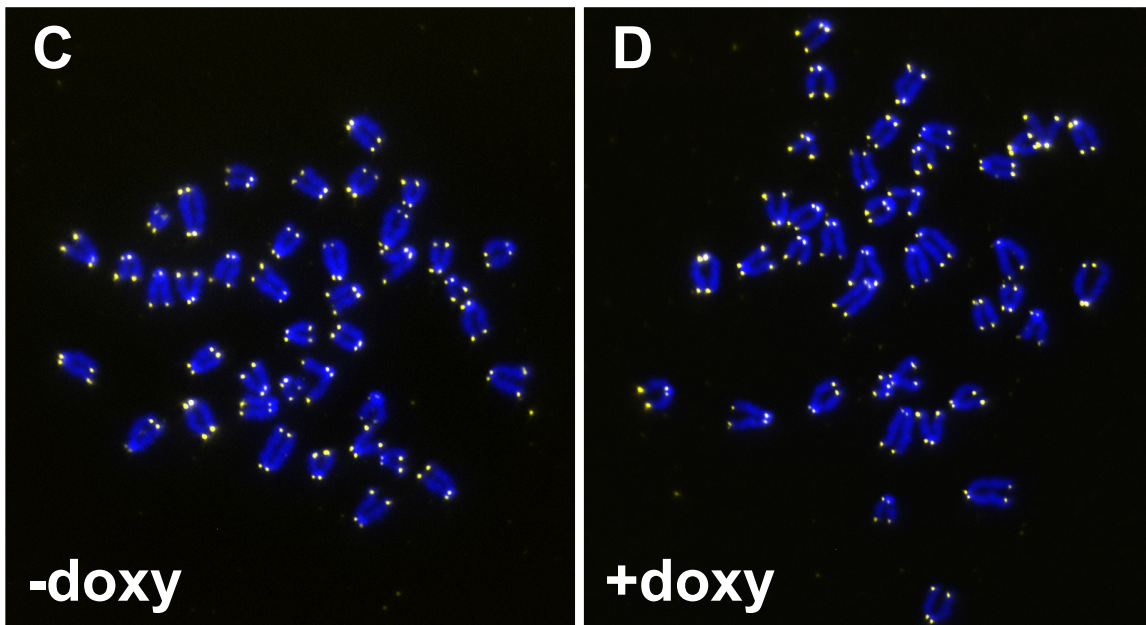

Supplement: pgen.0040010.sg002.pdf [file pgen.0040010.sg002.pdf]

|      | Pos | Neg | Non<br>-Tg | iK5<br>-TERT | iK5<br>-TERT <sup>ci</sup> |
|------|-----|-----|------------|--------------|----------------------------|
| Doxy |     |     | -          | - +          | - +                        |

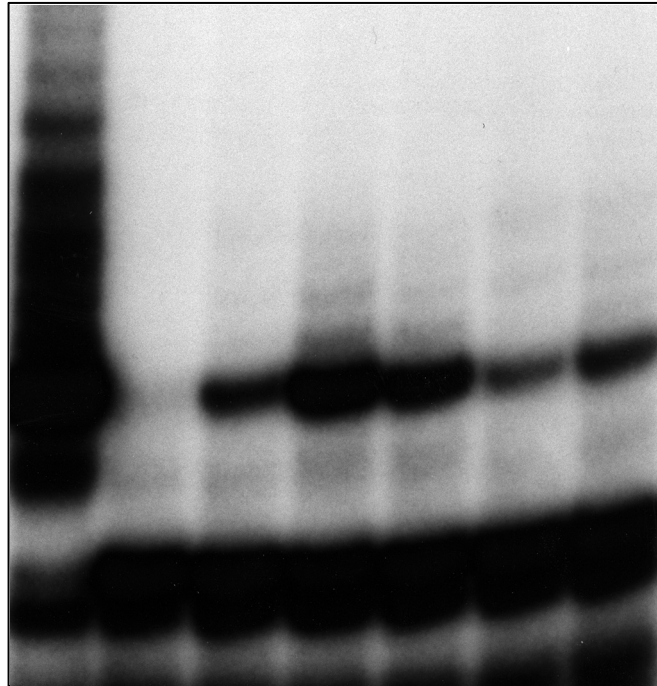

Supplement: pgen.0040010.sg003.pdf [file pgen.0040010.sg003.pdf]

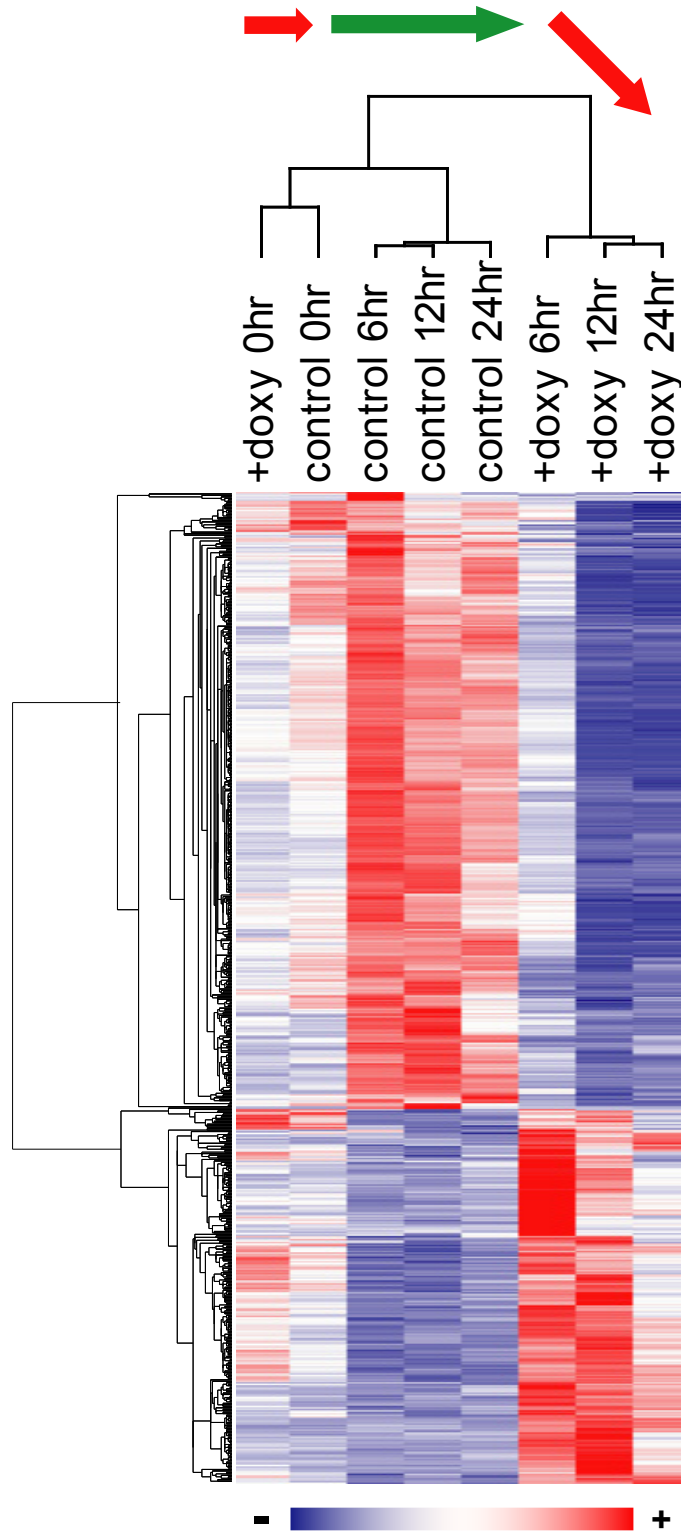

Supplement: pgen.0040010.sg004.pdf [file pgen.0040010.sg004.pdf]

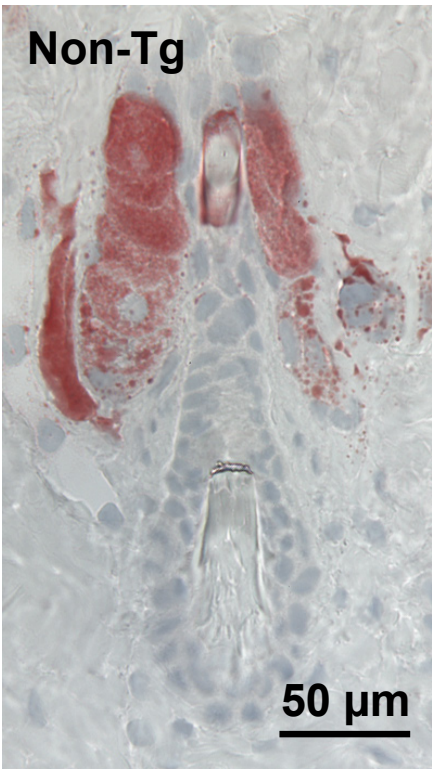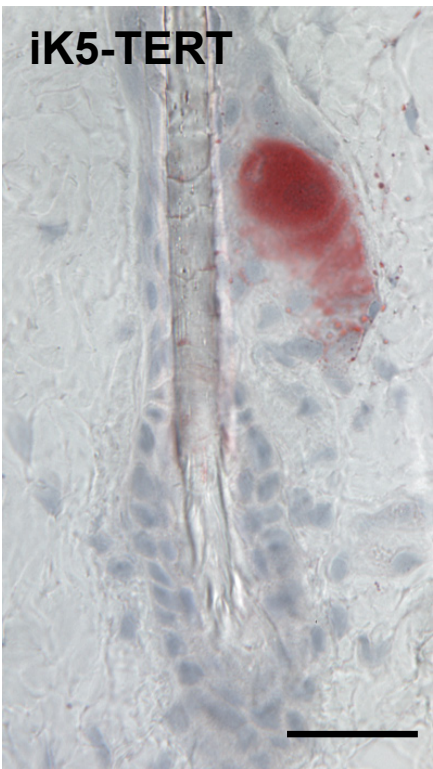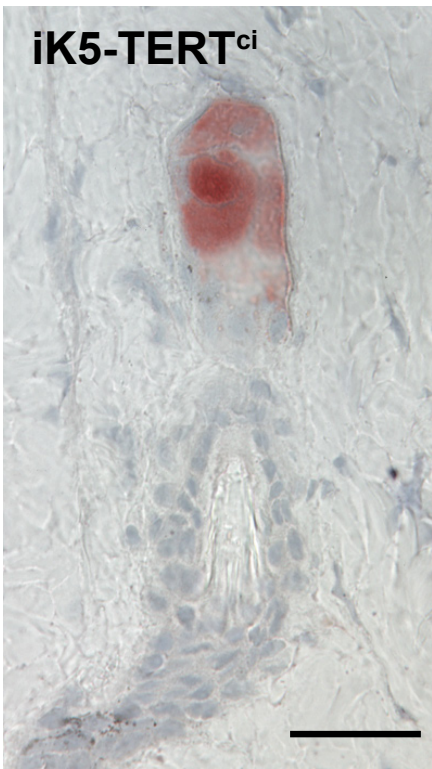

Supplement: pgen.0040010.sg005.pdf [file pgen.0040010.sg005.pdf]
